# Supplementary material for: Expression profiles and transcript properties of fast-twitch and slow-twitch muscles in a deep-sea highly migratory fish, Pseudocaranx dentex
Source: PeerJ. 2022 Mar 30;10:e12720. doi: 10.7717/peerj.12720 (PMC8976474; doi:10.7717/peerj.12720)
Supplement: Supplemental Information 1 [file peerj-10-12720-s001.xlsx]

## Sheet: Table S1
Table S1 Statistical of genes in different expression levels
FPKM Interval	Pd_WM_09	Pd_WM_10	Pd_WM_12	Pd_RM_09	Pd_RM_10	Pd_RM_12
0~1	11308(45.90%)	12677(51.46%)	11700(47.49%)	10470(42.50%)	9231(37.47%)	8792(35.69%)
1~3	4584(18.61%)	4520(18.35%)	4827(19.59%)	4258(17.28%)	4006(16.26%)	4160(16.89%)
3~15	6205(25.19%)	5284(21.45%)	5842(23.71%)	6766(27.46%)	7660(31.09%)	7771(31.54%)
15~60	1830(7.43%)	1487(6.04%)	1640(6.66%)	2199(8.93%)	2676(10.86%)	2784(11.30%)
>60	709(2.88%)	668(2.71%)	627(2.55%)	943(3.83%)	1063(4.31%)	1129(4.58%)
