# Supplementary material for: Expression profiles and transcript properties of fast-twitch and slow-twitch muscles in a deep-sea highly migratory fish, Pseudocaranx dentex
Source: PeerJ. 2022 Mar 30;10:e12720. doi: 10.7717/peerj.12720 (PMC8976474; doi:10.7717/peerj.12720)
Supplement: Supplemental Information 2 [file peerj-10-12720-s002.xlsx]

## Sheet: Table S2
Table S2 Expression levels validation by RT-qPCR
	fast-twitch muscle			slow-twitch muscle
	Sample1	Sample2	Sample3	Sample1	Sample2	Sample3
Myod1	1.41	1.15	1.61	0.00014	0.00012	0.0001
Myo7b	0.63	0.54	0.47	7.66	8.08	7.2
MybpC3	1.06	0.82	1.31	2.29	2.33	2.01
MyLC1	1.18	0.9	1.15	0.0027	0.0035	0.0029
MyL2b	1.24	1.42	1.88	14.48	17.9	15.23
MyL2	17.38	26.69	19.03	0.083	0.13	0.079
MyL7	1.59	1.19	1.17	79.35	69.1	93.01
TNNT2	1.25	1.11	1.49	7.55	8.07	8.8
TNNT3	1.23	0.99	0.97	9.2e-05	4e-05	3.8e-05
SLC25A4	1.02	1.46	0.91	0.00025	0.00037	0.00032
CASQ1	1.11	0.91	1.07	5.8e-05	7.3e-05	5.2e-05
TNNC1	1.85	0.86	1.33	3.31	2.7	3.51
