# Supplementary material for: Expression profiles and transcript properties of fast-twitch and slow-twitch muscles in a deep-sea highly migratory fish, Pseudocaranx dentex
Source: PeerJ. 2022 Mar 30;10:e12720. doi: 10.7717/peerj.12720 (PMC8976474; doi:10.7717/peerj.12720)
Supplement: Supplemental Information 3 [file peerj-10-12720-s003.xlsx]

## Sheet: Sheet1
Table S3 Sequencing and assembly statistics of the genome information of Pseudocaranx dentex
Statistic type	libraries	Sequence type	Insert size (bp)	Total data (G)	Read length (bp)	Sequence coverage (X)
DNA	Paired-End	Pacbio reads	-	80.69	-	122.53
DNA	Paired-End	Illumina reads	350	66.43	150	100.87
DNA	Paired-End	10X	600	62.71	-	95.23
DNA	Paired-End	Hic	-	118.65	-	180.17
DNA	Paired-End	Total	-	328.48	-	498.8
RNA	Paired-End	Pacbio reads	-	35.67	-	-
RNA	Paired-End	Illumina reads	350	54.07	150	-
RNA	Paired-End	Total	-	89.74	-	-
Sample ID	length		number
	Contig(bp)	Scaffold(bp)	Contig	Scaffold
Total	636713344	636821758	319	265
Max	33540834	33643690	-	-
Number>=2000	-	-	319	265
N50	25596984	28043942	11	11
N60	23330090	26776101	14	13
N70	21580000	25253669	17	16
N80	18170050	23983984	20	18
N90	7593720	21596001	25	21
